# Supplementary material
Source: Springer Nature journal article supplement (https://www.springermedizin.de/resource/supplementary/12885_2012_3773_MOESM3_ESM.pdf/9464410)

**A**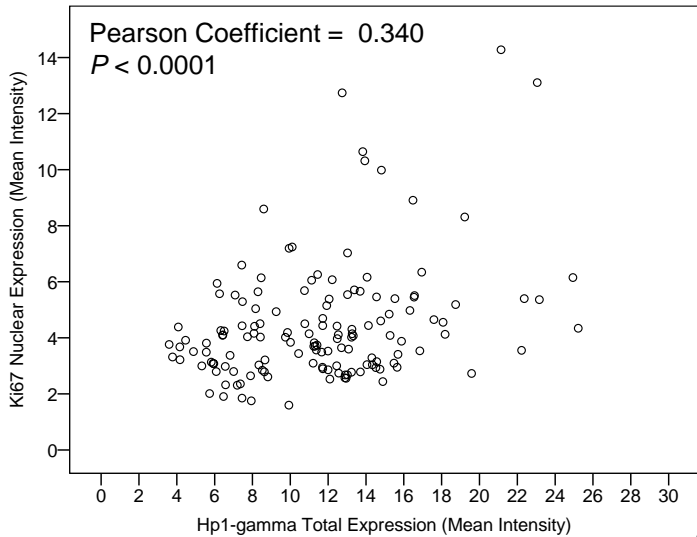**B**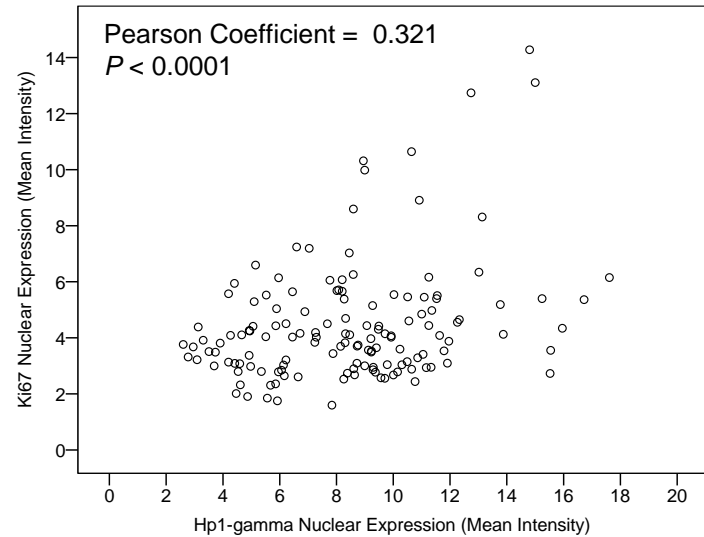**C**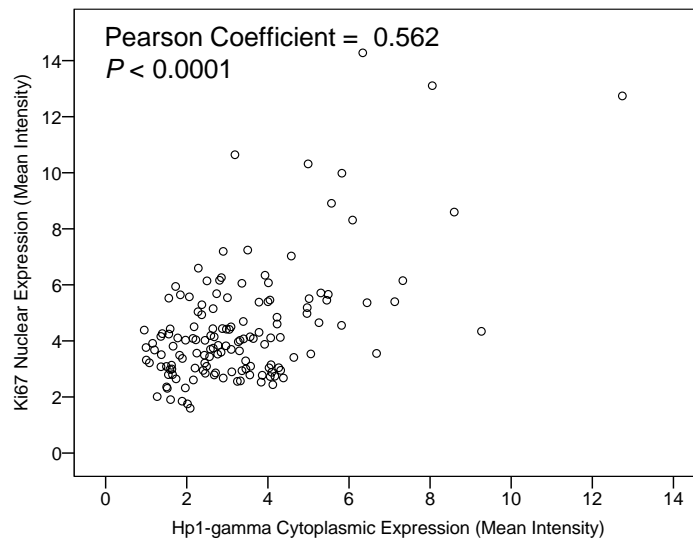

Supplement: MOESM3 [file 9464410]
